# Supplementary material
Source: HighWire-hosted journal article supplement (https://www.annfammed.org/content/suppl/2007/06/01/5.3.242)
Supplement: Tierney_Appendix.pdf [file Tierney_Appendix.pdf]

# ANNALS OF FAMILY MEDICINE

## Online Supplementary Material

Tierney WM, Oppenheimer C, Hudson B, et al. A national survey of primary care practice-based research networks. *Ann Fam Med*. 2007;5(3):242-250.

<http://www.annfammed.org/cgi/content/full/5/3/242/DC1>

### Supplemental Appendix. Practice-Based Research Networks (PBRNs) Participating in This Survey

| Abbreviation<br>or Nickname | Practice-Based Research Network                                              | Network Office<br>City, St |
|-----------------------------|------------------------------------------------------------------------------|----------------------------|
| AAFP NRN                    | AAFP National Research Network for Family Medicine and Primary Care Research | Leawood, Kan               |
| ACORN                       | Virginia Ambulatory Care Outcomes Research Network                           | Richmond, Va               |
| ACP Net                     | American College of Physicians Network                                       | Philadelphia, Pa           |
| ACRN                        | Ambulatory Care Research Network                                             | New York, NY               |
| ANSR                        | Ambulatory Network for Scholarship and Research                              | Peoria, Ill                |
| APBRN                       | Alabama Practice Based Research Network                                      | Birmingham, Ala            |
| APRNet                      | Advanced Practice Registered Nurses' Research Network                        | New Haven, Conn            |
| ARC                         | Arkansas Research Collaborative                                              | Little Rock, Ariz          |
| ARCHNet                     | Alliance for Research in Community Health                                    | Dayton, Ohio               |
| AzPREN                      | Arizona Practice-Based Research Network                                      | Tucson, Ariz               |
| BCPC*                       | Baltimore County Primary Care                                                | Towson, Md                 |
| BWPC-PBRN                   | Brigham and Women's Primary Care PBRN-Partners Community                     | Boston, Mass               |
| CAPRICORN                   | Capital Area Primary Care Research Network                                   | Washington, DC             |
| CaReNet                     | Colorado Research Network                                                    | Aurora, Colo               |
| CCHERS                      | Center for Community Health Education Research and Service                   | Boston, Mass               |
| CCPLA                       | Community-Clinic Partnership of Los Angeles                                  | Los Angeles, Calif         |
| CDN                         | Clinical Directors Network, Inc.                                             | New York, NY               |
| CECH                        | Clinicians Enhancing Child Health                                            | Hanover, NH                |
| CenTexNet                   | Central Texas Primary Care Research Network                                  | Temple, Tex                |
| CHA Net                     | Cambridge Hospital Alliance Research Network                                 | Cambridge, Mass            |
| CHCN                        | Community Health Center Network                                              | Alemeda, Calif             |
| CKHS                        | Crozer-Keystone Health Network                                               | Upland, Pa                 |
| COOP                        | The Dartmouth-Northern New England Primary Care Research Network             | Hanover, NH                |
| CORNET                      | Continuity Research Network                                                  | Baltimore, Md              |
| CPCRn                       | Cancer Prevention and Control Research Network                               | Roanoke, Va                |
| CPF                         | Cumberland Pediatric Foundation                                              | Nashville, Tenn            |
| CPPCR                       | Collaborative Partners for Primary Care Research                             | Rockford, Ill              |
| CPRG                        | Cincinnati Pediatric Research Group                                          | Cincinnati, Ohio           |
| CRN                         | UCSF/Stanford Collaborative Research Network                                 | San Francisco, Calif       |
| CUBS                        | Collaborative University Based Resources                                     | Baton Rouge, La            |
| DPCPBRN                     | Dayton Primary Care PBRN                                                     | Dayton, Ohio               |

*Supplemental Appendix continues*

# Online Supplementary Data

<http://www.annfammed.org/cgi/content/full/5/3/242/DC1>

| Abbreviation<br>or Nickname | Practice-Based Research Network                                   | Network Office<br>City, St |
|-----------------------------|-------------------------------------------------------------------|----------------------------|
| FM PittNet                  | FM-Pittnet                                                        | Pittsburgh, Pa             |
| GRIN                        | Great Lakes Research Into Practice Network                        | East Lansing, Mich         |
| HamesNet                    | HamesNet Research Network                                         | Augusta, Ga                |
| HH *                        | Healthy Hearts                                                    | Ripley, Tenn               |
| HPRN                        | High Plains Research Network                                      | Aurora, Colo               |
| IHC                         | Intermountain Health Care Physician Division                      | Salt Lake City, Utah       |
| INet                        | Indiana Family Practice Research Network                          | Indianapolis, Ind          |
| IRENE                       | Iowa Research Network                                             | Iowa City, Iowa            |
| KAN                         | Kentucky Ambulatory Network                                       | Lexington, Ky              |
| KSPRN                       | Kansas Practice Research Network                                  | Wichita, Kan               |
| LA Net                      | University of Southern California -Los Angeles PBRN               | Alhambra, Calif            |
| MAFPRN                      | Minnesota Academy of Family Physicians                            | Minneapolis, Minn          |
| MetroNet                    | A Metro Detroit Practice Based Research Network                   | Detroit, Mich              |
| MGPRN                       | Mercer-Georgia Physician Research Network                         | Macon, Ga                  |
| MNCCRN                      | Midwest Nursing Centers Consortium Research Network               | Milwaukee, Wisc            |
| MOMNet                      | Midwifery Outcomes and Management Network                         | Detroit, Mich              |
| MPA                         | Maryland Physicians Association, Inc.                             | Timonium, Md               |
| MSPBRN                      | Mount Sinai Primary Care Practice-Based Research Network          | New York, NY               |
| NC-FP-RN                    | The North Carolina Family Care PBRN                               | Chapel Hill, NC            |
| NCHPN                       | National Children's Health Project PBRN                           | New York, NY               |
| NECF                        | New England Clinicians Forum PBRN                                 | Hartford, Conn             |
| NEON                        | Northeastern Ohio Network                                         | Rootstown, Ohio            |
| NJFPBRN                     | New Jersey Family Physicians Network                              | Hillsborough, NJ           |
| NNCC Data Mart              | National Nursing Center Data Mart Research Network                | Philadelphia, Pa           |
| NOPCRN                      | Northwest Ohio Primary Care Research Network                      | Toledo, Ohio               |
| NYC Ring                    | New York City Research & Improvement Networking Group             | Bronx, NY                  |
| OKPRN                       | Oklahoma Physicians Resource/Research Network, Inc.               | Enid, Okla                 |
| ORPRN                       | Oregon Rural Practice-Based Research Network                      | Portland, Ore              |
| PCRC                        | Duke Primary Care Research Consortium                             | Durham, NC                 |
| PitNet                      | Pediatric PitNet                                                  | Pittsburgh, Pa             |
| PeRC                        | Children's Hospital of Philadelphia Pediatric Research Consortium | Philadelphia, Pa           |
| POPCRN                      | Providence of Oregon Primary Care Research Network                | Portland, Ore              |
| PPRG                        | Pediatric Practice Research Group                                 | Chicago, Ill               |
| PPRNet                      | Practice Partner Research Network                                 | Charleston, SC             |
| PRN *                       | ProHealth Physicians Research Network                             | Farmington, Conn           |
| PRONET                      | Pittsburgh Research Office Network                                | Pittsburgh, Pa             |
| PROS                        | Pediatric Research in Office Settings                             | Elk Grove Village, Ill     |
| PSARN                       | Penn State Ambulatory Research Network                            | Hershey, Pa                |
| PSPRN *                     | Puget Sound Pediatric Research Network                            | Seattle, Wash              |
| RAP                         | Research Association of Practicing Physicians                     | Cleveland, Ohio            |
| ResNet                      | IU Medical Group-Primary Care Research Network                    | Indianapolis, Ind          |
| RIOS Net                    | Research Involving Outpatient Settings Network                    | Albuquerque, NM            |
| RPCRP                       | Rural Primary Care Practice and Research Network                  | Kansas City, Kan           |
| RRN                         | Rainbow Research Network                                          | Cleveland, Ohio            |
| RRNeST                      | Residency Research Network of South Texas                         | San Antonio, Tex           |
| RushNet                     | Rushmore Practice-Based Research Network                          | Sioux Falls, SD            |

*Supplemental Appendix continues*

## Online Supplementary Data

<http://www.annfammed.org/cgi/content/full/5/3/242/DC1>

| Abbreviation<br>or Nickname                                                                                                                                                                                                                                                                                           | Practice-Based Research Network                                 | Network Office<br>City, St |
|-----------------------------------------------------------------------------------------------------------------------------------------------------------------------------------------------------------------------------------------------------------------------------------------------------------------------|-----------------------------------------------------------------|----------------------------|
| SPUR-Net                                                                                                                                                                                                                                                                                                              | The Southern Primary Care Urban Research Network                | Houston, Tex               |
| Surf Net                                                                                                                                                                                                                                                                                                              | San Diego Unified Research in Family Medicine Network           | La Jolla, Calif            |
| TriVPBRN*                                                                                                                                                                                                                                                                                                             | TriValley Practice Based Research Network                       | Perkasie, Pa               |
| UCLA PCRN                                                                                                                                                                                                                                                                                                             | UCLA Primary Care Research Network                              | Los Angeles, Calif         |
| VaPSRN                                                                                                                                                                                                                                                                                                                | University of Virginia Practice Support and Research Network    | Charlottesville, Va        |
| WHRN                                                                                                                                                                                                                                                                                                                  | Women's Health Research Network                                 | Chapel Hill, NC            |
| WReN                                                                                                                                                                                                                                                                                                                  | Wisconsin Research and Education Network                        | Madison, Wisc              |
| WU PAARC                                                                                                                                                                                                                                                                                                              | Washington University Pediatric and Adolescent Research Network | St. Louis, Mo              |
| WVRN                                                                                                                                                                                                                                                                                                                  | West Virginia Research Network                                  | Morgantown, WV             |
| AAFP = American Academy of Family Physicians; UCSF = University of California, San Francisco; IU = Indiana University;<br>UCLA = University of California, Los Angeles.                                                                                                                                               |                                                                 |                            |
| * In most cases, PBRNs identify themselves by an acronym or nickname. The asterisks indicate PBRNs that did not provide<br>an acronym. In these cases, the PBRN Resource Center created one for identification purposes on its Web site at<br><a href="http://www.pbrnrc.iupui.edu">http://www.pbrnrc.iupui.edu</a> . |                                                                 |                            |
